CORRECTION

# Correction: Microplastic exposure and allergic rhinitis: Network toxicology, and molecular docking insights

Yaojun Wang, Dandan Xu

The affiliation #1 was incorrectly assigned to the second author. Dandan Xu should be listed as affiliated only with #2 and #3. The correct affiliations are: 2 Central Laboratory, The First Affiliated Hospital of Hebei North University, Zhangjiakou, China. 3 Hebei Key Laboratory of Systems Biology and Gene Regulation, The First Affiliated Hospital of Hebei North University, Zhangjiakou, China.

## Reference

1. Wang Y, Xu D. Microplastic exposure and allergic rhinitis: Network toxicology, and molecular docking insights. PLoS One. 2025;20(10):e0334162. <https://doi.org/10.1371/journal.pone.0334162> PMID: [41105646](https://pubmed.ncbi.nlm.nih.gov/41105646/)

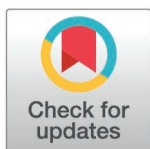

## OPEN ACCESS

**Citation:** Wang Y, Xu D (2025) Correction: Microplastic exposure and allergic rhinitis: Network toxicology, and molecular docking insights. PLoS One 20(12): e0339701. <https://doi.org/10.1371/journal.pone.0339701>

**Published:** December 29, 2025

**Copyright:** © 2025 Wang, Xu. This is an open access article distributed under the terms of the [Creative Commons Attribution License](https://creativecommons.org/licenses/by/4.0/), which permits unrestricted use, distribution, and reproduction in any medium, provided the original author and source are credited.
